# Supplementary material for: Molecular mechanism of activation-triggered subunit exchange in Ca2+/calmodulin-dependent protein kinase II
Source: eLife journal article supplement (doi:10.7554/elife.13405), 2016-03-07
Supplement: supp [file elife-13405-supp-v1.zip]

Archive with 11 entries (11 files):
- elife_poa_e13405_Figure_4_figure_supplement_2.pdf
- elife_poa_e13405_Figure_5_figure_supplement_1.pdf
- elife_poa_e13405_Figure_4_figure_supplement_4.pdf
- elife_poa_e13405_Figure_8_figure_supplement_1.pdf
- elife_poa_e13405_Figure_6_figure_supplement_1.pdf
- elife_poa_e13405_Figure_9_figure_supplement_1.pdf
- elife_poa_e13405_Figure_4_figure_supplement_3.pdf
- elife_poa_e13405_Figure_3_figure_supplement_1.pdf
- elife_poa_e13405_Supplementary_File_1.docx
- elife_poa_e13405_Figure_8_figure_supplement_2.pdf
- elife_poa_e13405_Figure_4_figure_supplement_1.pdf
