# Supplementary material for: Molecular mechanism of activation-triggered subunit exchange in Ca2+/calmodulin-dependent protein kinase II
Source: eLife journal article supplement (doi:10.7554/elife.13405), 2016-03-07
Supplement: supp [file elife-13405-supp-v1.zip › elife_poa_e13405_Figure_3_figure_supplement_1.pdf]

Figure 3-figure supplement 1

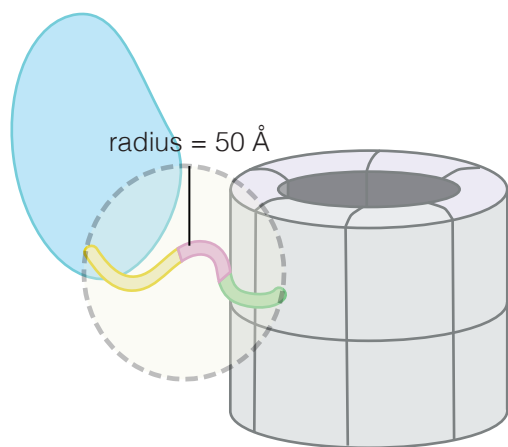

Local concentration ~ 3 mM

$$\begin{aligned}\text{Sphere of influence} &= \frac{4}{3} \pi (\text{radius})^3 \\ &= 5 \times 10^{-25} \text{ m}^3 \\ &= 5 \times 10^{-22} \text{ L} = 1 \text{ molecule} \\ 1 \text{ L} &= 0.2 \times 10^{-22} \text{ molecules} = 3 \text{ mM}\end{aligned}$$
