# Supplementary figures and images for: Molecular mechanism of activation-triggered subunit exchange in Ca2+/calmodulin-dependent protein kinase II
Source: eLife journal article supplement (doi:10.7554/elife.13405), 2016-03-07

Figure 8-figure supplement 2

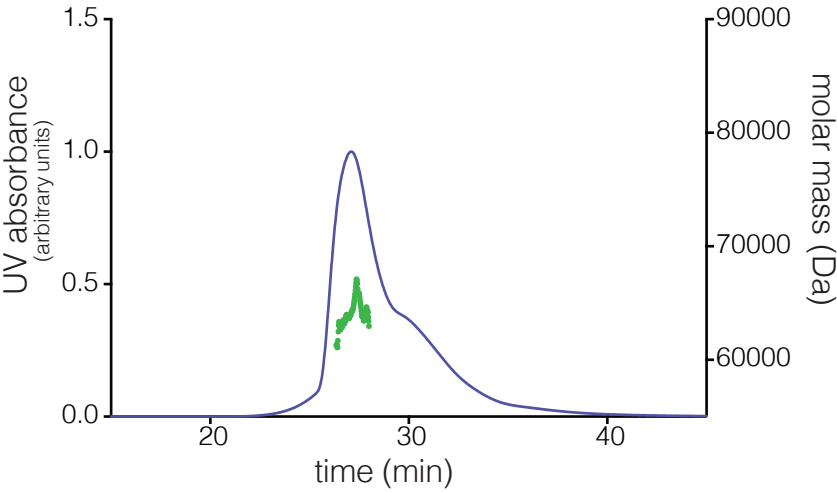

Supplement: supp [file elife-13405-supp-v1.zip]

Figure 4-figure supplement 1

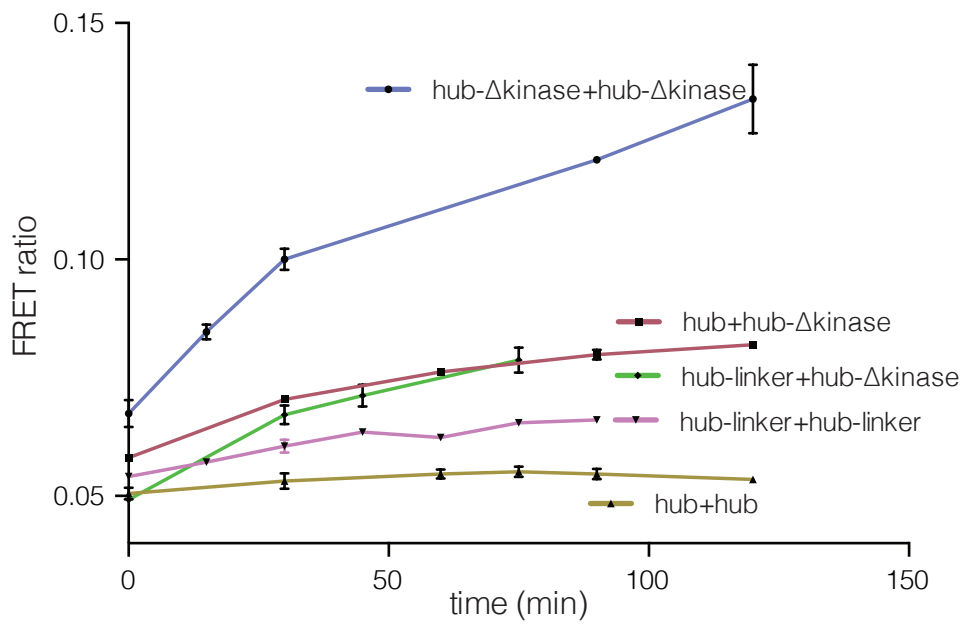

Supplement: supp [file elife-13405-supp-v1.zip]

Figure 4-figure supplement 4

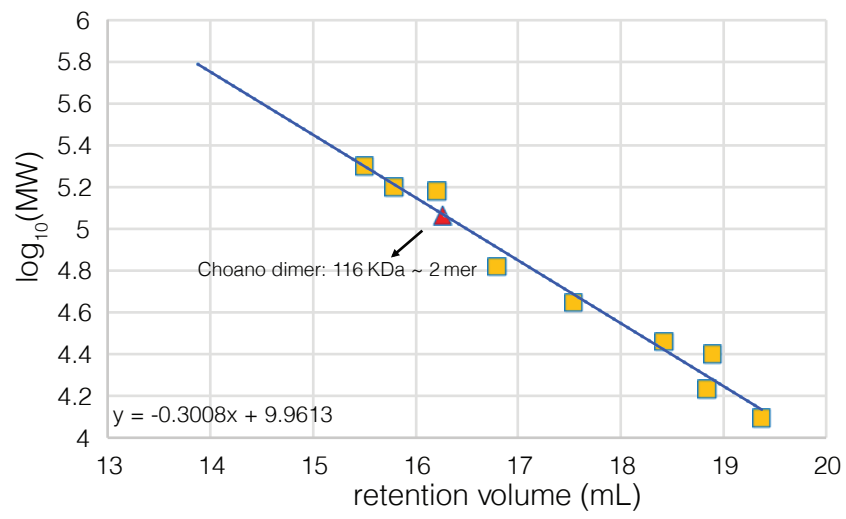

Supplement: supp [file elife-13405-supp-v1.zip]

Figure 4-figure supplement 2

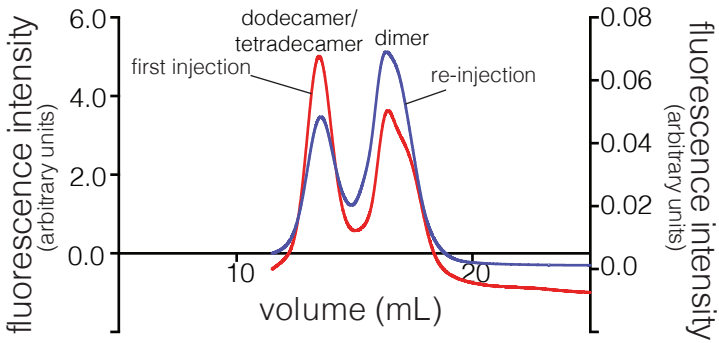

re-injection of dodecamer/tetradecamer  
peak re-releases dimers

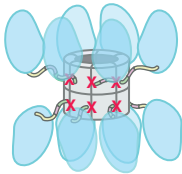

Supplement: supp [file elife-13405-supp-v1.zip]

Figure 8-figure supplement 1

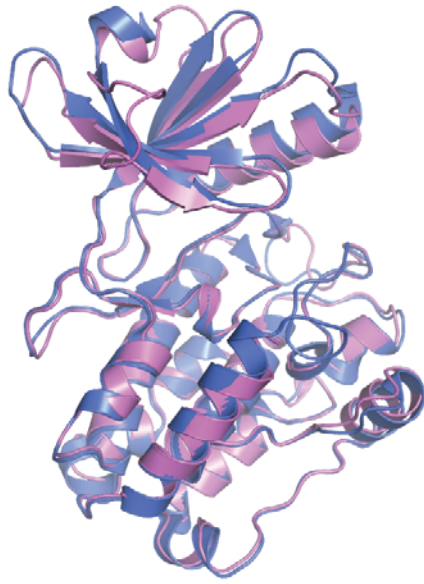

● human CaMKII- $\delta$  kinase (PDB code: 2VN9)

● *S. rosetta* CaMKII kinase

Supplement: supp [file elife-13405-supp-v1.zip]

Figure 5-figure supplement 1

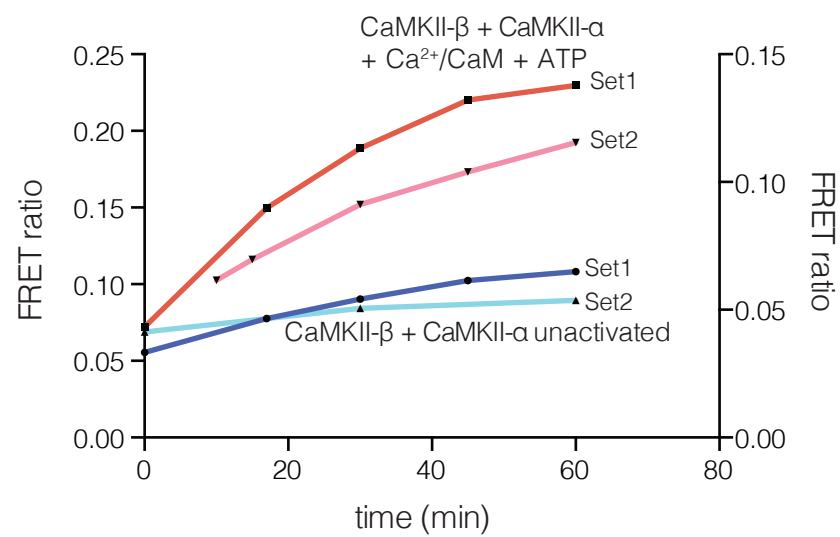

Supplement: supp [file elife-13405-supp-v1.zip]

Figure 6-figure supplement 1

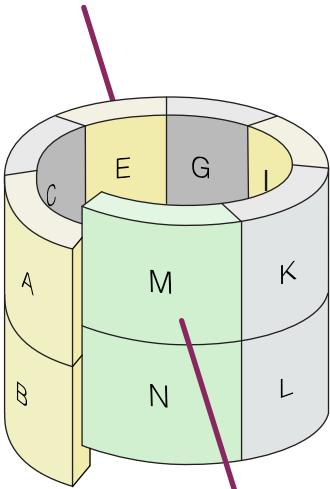

2-fold axis

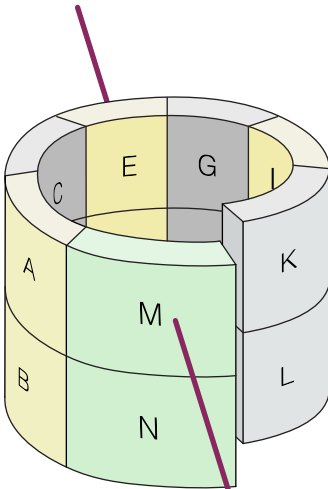

2-fold axis

Supplement: supp [file elife-13405-supp-v1.zip › elife_poa_e13405_Figure_6_figure_supplement_1.pdf]

Figure 9-figure supplement 1

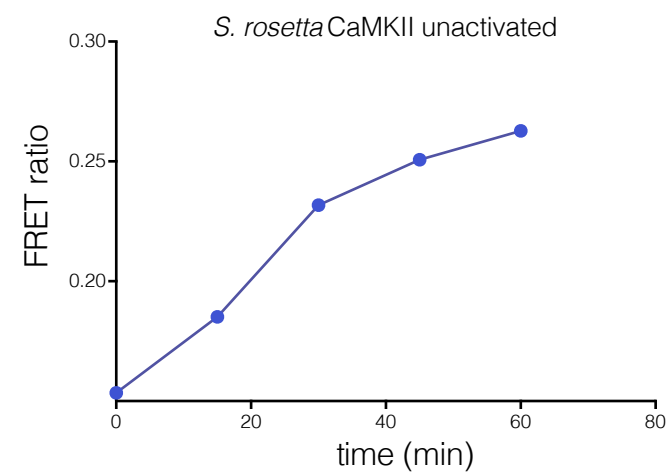

Supplement: supp [file elife-13405-supp-v1.zip › elife_poa_e13405_Figure_9_figure_supplement_1.pdf]

Figure 4-figure supplement 3

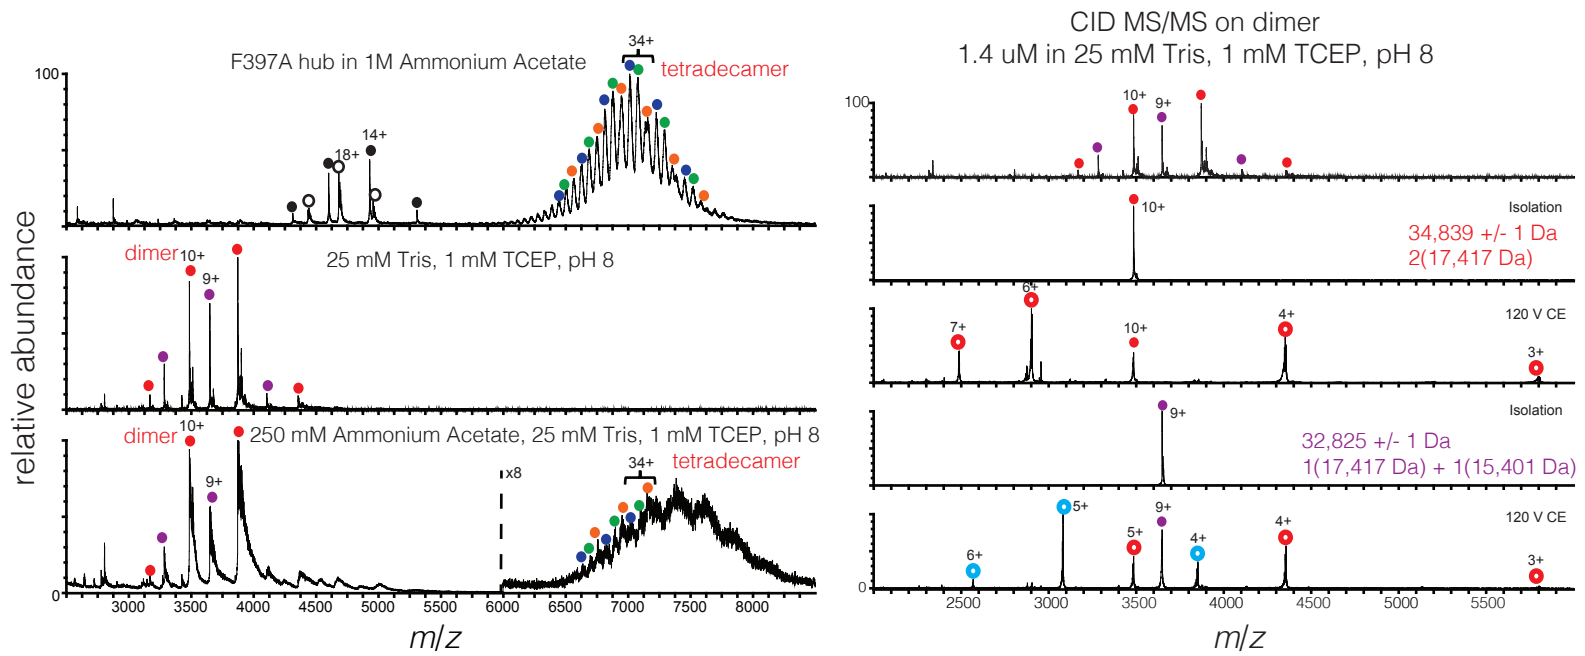

Supplement: supp [file elife-13405-supp-v1.zip › elife_poa_e13405_Figure_4_figure_supplement_3.pdf]
